# Supplementary material
Source: ML conference proceedings conference paper supplement (https://openaccess.thecvf.com/content/CVPR2023/html/Truong_FREDOM_Fairness_Domain_CVPR_2023_paper.html)
Supplement: Supplementary file 1 [file Truong_FREDOM_Fairness_Domain_CVPR_2023_supplemental.pdf]

# Supplementary

## FREDOM: Fairness Domain Adaptation Approach to Semantic Scene Understanding

Thanh-Dat Truong<sup>1</sup>, Ngan Le<sup>1</sup>, Bhiksha Raj<sup>2</sup>, Jackson Cothren<sup>3</sup>, Khoa Luu<sup>1</sup>  
<sup>1</sup>CVIU Lab, University of Arkansas, USA    <sup>2</sup>Carnegie Mellon University, USA

<sup>3</sup>Dep. of Geosciences, University of Arkansas, USA

{tt032, thile, jcothre, khoaluu}@uark.edu, bhiksha@cs.cmu.edu

### 1. Proof Of Eqn. (8)

Taking the logarithm of Eqn. (6) and Eqn. (7), the optimization formula can be derived as follows:

$$\begin{aligned}
\theta^* &= \arg \min_{\theta} \left[ \mathbb{E}_{\mathbf{x}_s \sim p_s(\mathbf{x}_s), \hat{\mathbf{y}}_s \sim p_s(\hat{\mathbf{y}}_s)} \mathcal{L}_s(\mathbf{y}_s, \hat{\mathbf{y}}_s) \frac{p'_s(\mathbf{y}_s)}{p_s(\mathbf{y}_s)} + \mathbb{E}_{\mathbf{x}_t \sim p_t(\mathbf{x}_t)} \mathcal{L}_t(\mathbf{y}_t) \frac{p'_s(\mathbf{y}_t)}{p_s(\mathbf{y}_t)} \right] \\
&\simeq \arg \min_{\theta} \left[ \mathbb{E}_{\mathbf{x}_s \sim p_s(\mathbf{x}_s), \hat{\mathbf{y}}_s \sim p_s(\hat{\mathbf{y}}_s)} \log \left( \mathcal{L}_s(\mathbf{y}_s, \hat{\mathbf{y}}_s) \frac{p'_s(\mathbf{y}_s)}{p_s(\mathbf{y}_s)} \right) + \mathbb{E}_{\mathbf{x}_t \sim p_t(\mathbf{x}_t)} \log \left( \mathcal{L}_t(\mathbf{y}_t) \frac{p'_s(\mathbf{y}_t)}{p_s(\mathbf{y}_t)} \right) \right] \\
&= \arg \min_{\theta} \left[ \mathbb{E}_{\mathbf{x}_s \sim p_s(\mathbf{x}_s), \hat{\mathbf{y}}_s \sim p_s(\hat{\mathbf{y}}_s)} \left( \log \mathcal{L}_s(\mathbf{y}_s, \hat{\mathbf{y}}_s) + \log \frac{p'_s(\mathbf{y}_s)}{p_s(\mathbf{y}_s)} \right) + \mathbb{E}_{\mathbf{x}_t \sim p_t(\mathbf{x}_t)} \left( \log \mathcal{L}_t(\mathbf{y}_t) + \log \frac{p'_s(\mathbf{y}_t)}{p_s(\mathbf{y}_t)} \right) \right] \\
&= \arg \min_{\theta} \frac{1}{N} \left[ \mathbb{E}_{\mathbf{x}_s \sim p_s(\mathbf{x}_s), \hat{\mathbf{y}}_s \sim p_s(\hat{\mathbf{y}}_s)} \log \mathcal{L}_s(\mathbf{y}_s, \hat{\mathbf{y}}_s) + \mathbb{E}_{\mathbf{x}_s \sim p_s(\mathbf{x}_s)} \frac{1}{N} \sum_{k=1}^N \log \left( \frac{p'_s(y_s^k) p'_s(\mathbf{y}_s^{\setminus k} | y_s^k)}{p_s(y_s^k) p_s(\mathbf{y}_s^{\setminus k} | y_s^k)} \right) \right. \\
&\quad \left. + \mathbb{E}_{\mathbf{x}_t \sim p_t(\mathbf{x}_t)} \log \mathcal{L}_t(\mathbf{y}_t) + \mathbb{E}_{\mathbf{x}_t \sim p_t(\mathbf{x}_t)} \frac{1}{N} \sum_{k=1}^N \log \left( \frac{p'_s(y_t^k) p'_s(\mathbf{y}_t^{\setminus k} | y_t^k)}{p_s(y_t^k) p_s(\mathbf{y}_t^{\setminus k} | y_t^k)} \right) \right] \\
&= \arg \min_{\theta} \frac{1}{N} \left[ \mathbb{E}_{\mathbf{x}_s \sim p_s(\mathbf{x}_s), \hat{\mathbf{y}}_s \sim p_s(\hat{\mathbf{y}}_s)} \log \mathcal{L}_s(\mathbf{y}_s, \hat{\mathbf{y}}_s) + \mathbb{E}_{\mathbf{x}_t \sim p_t(\mathbf{x}_t)} \log \mathcal{L}_t(\mathbf{y}_t) \right. \\
&\quad \left. + \frac{1}{N} \sum_{KBk=1}^N \left( \mathbb{E}_{\mathbf{x}_s \sim p_s(\mathbf{x}_s)} \log \left( \frac{p'_s(y_s^k)}{p_s(y_s^k)} \right) + \mathbb{E}_{\mathbf{x}_t \sim p_t(\mathbf{x}_t)} \log \left( \frac{p'_s(y_t^k)}{p_s(y_t^k)} \right) \right) \right. \\
&\quad \left. + \frac{1}{N} \sum_{k=1}^N \left( \mathbb{E}_{\mathbf{x}_s \sim p_s(\mathbf{x}_s)} \log \left( \frac{p'_s(\mathbf{y}_s^{\setminus k} | y_s^k)}{p_s(\mathbf{y}_s^{\setminus k} | y_s^k)} \right) + \mathbb{E}_{\mathbf{x}_t \sim p_t(\mathbf{x}_t)} \log \left( \frac{p'_s(\mathbf{y}_t^{\setminus k} | y_t^k)}{p_s(\mathbf{y}_t^{\setminus k} | y_t^k)} \right) \right) \right]
\end{aligned}$$

In addition, minimizing  $\log \mathcal{L}_s(\mathbf{y}_s, \hat{\mathbf{y}}_s)$  and  $\log \mathcal{L}_t(\mathbf{y}_t)$  is equivalent to minimizing  $\mathcal{L}_s(\mathbf{y}_s, \hat{\mathbf{y}}_s)$  and  $\mathcal{L}_t(\mathbf{y}_t)$ . Therefore, the above formula can be further derived as follows:

$$\begin{aligned}
\theta^* &\simeq \arg \min_{\theta} \left[ \mathbb{E}_{\mathbf{x}_s \sim p_s(\mathbf{x}_s), \hat{\mathbf{y}}_s \sim p_s(\hat{\mathbf{y}}_s)} \mathcal{L}_s(\mathbf{y}_s, \hat{\mathbf{y}}_s) + \mathbb{E}_{\mathbf{x}_t \sim p_t(\mathbf{x}_t)} \mathcal{L}_t(\mathbf{y}_t) \right. \\
&\quad \left. + \frac{1}{N} \sum_{k=1}^N \left( \mathbb{E}_{\mathbf{x}_s \sim p_s(\mathbf{x}_s)} \log \left( \frac{p'_s(y_s^k)}{p_s(y_s^k)} \right) + \mathbb{E}_{\mathbf{x}_t \sim p_t(\mathbf{x}_t)} \log \left( \frac{p'_s(y_t^k)}{p_s(y_t^k)} \right) \right) \right. \\
&\quad \left. + \frac{1}{N} \sum_{k=1}^N \left( \mathbb{E}_{\mathbf{x}_s \sim p_s(\mathbf{x}_s)} \log \left( \frac{p'_s(\mathbf{y}_s^{\setminus k} | y_s^k)}{p_s(\mathbf{y}_s^{\setminus k} | y_s^k)} \right) + \mathbb{E}_{\mathbf{x}_t \sim p_t(\mathbf{x}_t)} \log \left( \frac{p'_s(\mathbf{y}_t^{\setminus k} | y_t^k)}{p_s(\mathbf{y}_t^{\setminus k} | y_t^k)} \right) \right) \right]
\end{aligned}$$

## 2. Implementation Details

Our proposed FREDOM approach is implemented based on the implementation of SAC [1], DAFormer [6], and ImageGPT [2]. In particular, we borrow the implementation of DeepLab-V2 of SAC<sup>1</sup>. We use DeepLab-V2 with ResNet-101 backbone. The Atrous Spatial Pyramid Pooling with a sampling rate of  $\{6, 12, 18, 24\}$  has been implemented in our work. The predicted segmentation is computed from the output of layer *conv5*. For the Transformer backbone, we borrow the implementation of DAFormer<sup>2</sup>. Our Transformer architecture also uses the MiT-B5 encoder as the backbone to produce a feature pyramid with dimensions of  $\{64, 128, 320, 512\}$ . To output the predicted segmentation, we use the decoder with a dilation rate of  $\{1, 6, 12, 18\}$ . Both DeepLab-V2 and Transformer of segmentation networks are pretrained on ImageNet-1K. For the Conditional Structure Network, we adopt the implementation of Image-GPT<sup>3</sup>. The structure of our conditional network structure is designed based on the base version of Image GPT [2], which is a variant of GPT-2 [8]. The Conditional Structure Network  $G$  is trained on the segmentation labels of the source domain.

For the adaptation loss in the target domain  $\mathcal{L}_t$ , we also use the self-supervised loss with pseudo labels [1]. Our training procedure and augmentation methods are implemented based on the implementation of SAC [1] and DAFormer [6]. We also adopt the data sampling technique of SAC [1] in our training. For the mask sampling technique, during training the conditional structure network, for each image in each iteration, we randomly generate a binary mask within three cases, as mentioned in the main paper.

## 3. Additional Experimental Results

### 3.1. Ablation Study

Table 1. Effectiveness of our Mask Sampling Approach to Fairness Improvement Using DeepLab-V2 (DL-V2).

|                      | $\mathcal{L}_{Class}$ | $\mathcal{L}_{Cond}$ |    |    | Majority Group |             |             |             |             |             | Minority Group |             |             |             |             |             |             |             |             |             | mIoU        | STD         |             |             |             |
|----------------------|-----------------------|----------------------|----|----|----------------|-------------|-------------|-------------|-------------|-------------|----------------|-------------|-------------|-------------|-------------|-------------|-------------|-------------|-------------|-------------|-------------|-------------|-------------|-------------|-------------|
|                      |                       | M1                   | M2 | M3 | Road           | Build.      | Veget.      | Car         | S.Walk      | Sky         | Pole           | Person      | Terrain     | Fence       | Wall        | Sign        | Bike        | Truck       | Bus         | Train       |             |             | Tr.Light    | Rider       | M.bike      |
| DL-V2                | ✗                     | ✗                    | ✗  | ✗  | 90.3           | 87.2        | 88.1        | 88.6        | 53.5        | 87.3        | 44.4           | 67.3        | 42.2        | 28.5        | 41.1        | 50.1        | 54.4        | 52.5        | 56.9        | 33.7        | 48.9        | 33.1        | 42.6        | 57.4        | 20.9        |
| + $\mathcal{L}_{NG}$ | ✗                     | ✗                    | ✗  | ✗  | 90.4           | 87.1        | 88.0        | 88.6        | 53.6        | 87.2        | 44.7           | 67.4        | 42.3        | 28.4        | 41.2        | 49.8        | 54.9        | 53.0        | 57.2        | 37.8        | 48.8        | 33.0        | 42.5        | 57.7        | 20.7        |
| + $\mathcal{L}_{CB}$ | ✗                     | ✗                    | ✗  | ✗  | 90.5           | 87.2        | 88.2        | 88.7        | 53.5        | 87.3        | 44.8           | 67.6        | 42.2        | 28.5        | 41.6        | 51.6        | 53.8        | 54.3        | 57.6        | 37.5        | 49.2        | 33.6        | 43.5        | 58.0        | 20.6        |
| DL-V2                | ✓                     | ✗                    | ✗  | ✗  | 90.6           | 87.3        | 88.1        | 88.8        | 53.7        | 87.4        | 44.9           | 67.7        | 42.3        | 28.6        | 41.9        | 52.9        | 57.6        | 55.2        | 57.5        | 47.6        | 50.8        | 36.9        | 44.9        | 59.2        | 19.8        |
| DL-V2                | ✓                     | ✓                    | ✗  | ✗  | 90.6           | 87.3        | 88.2        | 88.8        | 53.7        | 87.5        | 44.9           | 67.8        | 42.2        | 29.0        | 41.9        | 53.0        | 57.7        | 55.2        | 57.7        | 48.8        | 50.8        | 37.5        | 45.1        | 59.4        | 19.7        |
| DL-V2                | ✓                     | ✓                    | ✓  | ✗  | 90.8           | 87.5        | 88.5        | 88.9        | 54.0        | 87.6        | 45.1           | 68.4        | 42.3        | 30.4        | 42.1        | 53.6        | 57.8        | 55.3        | 58.7        | 53.7        | 50.8        | 39.5        | 46.1        | 60.1        | 19.3        |
| DL-V2                | ✓                     | ✓                    | ✓  | ✓  | <b>90.9</b>    | <b>87.8</b> | <b>88.6</b> | <b>89.7</b> | <b>54.1</b> | <b>89.5</b> | <b>45.2</b>    | <b>68.8</b> | <b>42.6</b> | <b>32.6</b> | <b>44.1</b> | <b>57.1</b> | <b>58.1</b> | <b>58.4</b> | <b>62.6</b> | <b>55.3</b> | <b>51.4</b> | <b>40.0</b> | <b>47.7</b> | <b>61.3</b> | <b>19.1</b> |

**Effectiveness of Mask Sampling Approach** To further illustrate the effectiveness, we conduct additional ablation studies using DeepLabV2 (DL-V2) under the domain adaptation setting trained on the GTA5  $\rightarrow$  Cityscapes benchmark. We consider experiments of the pre-defined weight-balancing different classes [13] ( $\mathcal{L}_{CB}$ ), normalizing gradients ( $\mathcal{L}_{NG}$ ). In addition, we evaluate the impact of the mask sampling approaches to the fairness improvement. There are three different strategies of binary mask samplings that will be evaluated, i.e., (1) If  $\mathbf{m}$  contains only one unmasked pixel (denoted as **M1**),  $G$  learns to capture structural information of segmentation conditioned on a given pixel, (2) If  $\mathbf{m}$  contains more than one unmasked pixel (denoted as **M2**), it increases the flexibility of  $G$  on learning segmentation structures conditioned on unmasked pixels, (3) If  $\mathbf{m}$  does not contain any unmasked pixels (denoted as **M3**), it is equivalent to learning the log-likelihood of segmentation maps. The experimental results in Table 1 show the advantages of our method. We found that  $\mathcal{L}_{NG}$  stabilizes the training procedure and  $\mathcal{L}_{CB}$  brings a minor improvement. Also, while  $\mathcal{L}_{Cond}$  with simple binary masks sampled as M1 is not powerful enough to model the conditional structures, combining three strategies of mask samplings brings a significant performance improvement of the segmentation model, especially in classes of the minority group, and promotes fairness in the model.

### 3.2. Quantitative Results

Table 2 reports our experimental results using DeepLab-V2 and Transformer networks compared to prior unsupervised domain adaptation methods. The table includes the results of both benchmarks, i.e., SYNTHIA  $\rightarrow$  Cityscapes and GTA5  $\rightarrow$  Cityscapes. Overall, our proposed approach has achieved State-of-the-Art performance on both benchmarks and significantly improved the IoU results of classes in the minority which means promoting fairness of the model predictions.

<sup>1</sup><https://github.com/visinf/da-sac>

<sup>2</sup><https://github.com/lhoyer/DAFormer>

<sup>3</sup><https://github.com/teddykoker/image-gpt>

Table 2. Comparison of Semantic Segmentation Performance with UDA Methods Using DeepLab-V2 (DL-V2) and Transformer (Trans.).

| Approach             | Network | Majority Group |             |             |             |             |             | Minority Group |             |             |             |             |             |             |             |             |             |             |             | mIoU        | STD         |             |
|----------------------|---------|----------------|-------------|-------------|-------------|-------------|-------------|----------------|-------------|-------------|-------------|-------------|-------------|-------------|-------------|-------------|-------------|-------------|-------------|-------------|-------------|-------------|
|                      |         | Road           | Build.      | Veget.      | Car         | S.Walk      | Sky         | Pole           | Person      | Terrain     | Fence       | Wall        | Sign        | Bike        | Truck       | Bus         | Train       | Tr.Light    | Rider       |             |             | M.bike      |
| SYNTHIA → Cityscapes |         |                |             |             |             |             |             |                |             |             |             |             |             |             |             |             |             |             |             |             |             |             |
| CBST [15]            | DL-V2   | 68.0           | 76.3        | 77.6        | 81.6        | 29.9        | 78.3        | 33.9           | 60.6        | —           | 1.4         | 10.8        | 29.5        | 39.8        | —           | 23.5        | —           | 22.8        | 28.3        | 18.8        | 42.6        | 26.8        |
| DACS [9]             | DL-V2   | 80.6           | 81.9        | 83.7        | 82.9        | 25.1        | 90.8        | 37.2           | 67.6        | —           | 2.9         | 21.5        | 24.0        | 47.6        | —           | 38.9        | —           | 22.7        | 38.3        | 28.5        | 48.3        | 28.4        |
| CorDA [13]           | DL-V2   | 93.3           | 85.3        | 84.9        | 85.6        | 61.6        | 90.4        | 37.8           | 69.7        | —           | 5.1         | 19.6        | 42.8        | 53.9        | —           | 38.4        | —           | 36.6        | 41.8        | 32.6        | 55.0        | 27.3        |
| AdvEnt [11]          | DL-V2   | 87.0           | 79.7        | 80.1        | 72.7        | 44.1        | 83.6        | 24.3           | 56.4        | —           | 0.6         | 9.6         | 7.2         | 33.7        | —           | 32.6        | —           | 4.8         | 23.7        | 12.8        | 40.8        | 31.4        |
| DADA [12]            | DL-V2   | 89.2           | 81.4        | 81.8        | 79.7        | 44.8        | 84.0        | 26.2           | 54.7        | —           | 0.3         | 6.8         | 11.1        | 38.8        | —           | 40.7        | —           | 8.6         | 19.3        | 14.0        | 42.6        | 32.0        |
| MaxSquare [3]        | DL-V2   | 82.9           | 80.3        | 82.5        | 79.0        | 40.7        | 82.2        | 25.8           | 53.1        | —           | 0.8         | 10.2        | 18.2        | 35.6        | —           | 31.4        | —           | 12.8        | 18.0        | 10.4        | 41.4        | 30.6        |
| IntraDA [7]          | DL-V2   | 84.3           | 79.5        | 80.0        | 78.0        | 37.7        | 84.1        | 24.9           | 57.2        | —           | 0.4         | 5.3         | 8.4         | 36.5        | —           | 38.1        | —           | 9.2         | 23.0        | 20.3        | 41.7        | 31.0        |
| BiMaL [10]           | DL-V2   | <b>92.8</b>    | 81.5        | 82.4        | 85.7        | <b>51.5</b> | <b>84.6</b> | 30.4           | 55.9        | —           | 1.0         | 10.2        | 15.9        | 38.8        | —           | 44.5        | —           | 17.6        | 22.3        | 24.6        | 46.2        | 30.9        |
| SAC [1]              | DL-V2   | 89.3           | 85.6        | 87.1        | 87.0        | 47.3        | 89.1        | 43.1           | 63.7        | —           | 1.3         | 26.6        | 32.0        | 52.8        | —           | 35.6        | —           | 45.6        | 25.3        | 30.3        | 52.6        | 27.9        |
| ProDA [14]           | DL-V2   | 87.8           | <b>84.6</b> | <b>88.1</b> | 88.2        | 45.7        | 84.4        | 44.0           | <b>74.2</b> | —           | 0.6         | <b>37.1</b> | 37.0        | 45.6        | —           | 51.1        | —           | <b>54.6</b> | <b>24.3</b> | 40.5        | 55.5        | 26.4        |
| <b>FREDOM</b>        | DL-V2   | 86.0           | <b>87.0</b> | 87.1        | 87.1        | 46.3        | <b>89.1</b> | <b>48.7</b>    | 71.2        | —           | <b>5.3</b>  | <b>33.3</b> | <b>46.8</b> | <b>59.9</b> | —           | <b>54.6</b> | —           | 53.4        | <b>38.1</b> | <b>51.3</b> | <b>59.1</b> | <b>24.0</b> |
| TransDA-S [4]        | Trans.  | 82.1           | 86.2        | 89.2        | 90.9        | 40.9        | 90.3        | 53.0           | 68.0        | —           | 1.0         | 25.8        | 36.1        | 45.4        | —           | 58.4        | —           | 53.7        | 26.2        | 41.2        | 55.5        | 27.1        |
| TransDA [4]          | Trans.  | <b>90.4</b>    | 86.4        | <b>90.3</b> | <b>92.3</b> | <b>54.8</b> | 93.0        | 53.8           | 71.2        | —           | 1.7         | 31.1        | 37.1        | 49.8        | —           | 66.0        | —           | 61.1        | 25.3        | 44.4        | 59.3        | 27.3        |
| ProCST [5]           | Trans.  | 84.3           | 87.7        | 86.1        | 87.6        | 41.1        | 87.9        | 50.7           | 74.7        | —           | 6.1         | 42.6        | 54.2        | 62.5        | —           | 61.4        | —           | 55.5        | 47.2        | 53.3        | 61.4        | 22.6        |
| DAFormer [6]         | Trans.  | 84.5           | 88.4        | 86.0        | 87.2        | 40.7        | 89.8        | 50.0           | 73.2        | —           | 6.5         | 41.5        | 54.6        | 61.7        | —           | 53.2        | —           | 55.0        | 48.2        | 53.9        | 60.9        | 22.8        |
| <b>FREDOM</b>        | Trans.  | 89.4           | <b>89.3</b> | 89.9        | 90.5        | 50.8        | <b>93.7</b> | <b>57.3</b>    | <b>79.4</b> | —           | <b>9.3</b>  | <b>48.8</b> | <b>60.1</b> | <b>68.1</b> | —           | <b>66.0</b> | —           | <b>65.1</b> | <b>51.6</b> | <b>62.3</b> | <b>67.0</b> | <b>22.0</b> |
| GTA5 → Cityscapes    |         |                |             |             |             |             |             |                |             |             |             |             |             |             |             |             |             |             |             |             |             |             |
| CBST [15]            | DL-V2   | 91.8           | 80.5        | 83.9        | 82.7        | 53.5        | 80.9        | 34.0           | 53.1        | 34.2        | 21.0        | 32.7        | 20.4        | 42.8        | 30.3        | 35.9        | 16.0        | 28.9        | 24.0        | 25.9        | 45.9        | 25.4        |
| DACS [9]             | DL-V2   | 89.9           | 87.9        | 88.0        | 84.5        | 39.7        | 88.8        | 38.5           | 67.2        | 44.0        | 39.5        | 30.7        | 52.8        | 34.0        | 45.7        | 50.2        | 0.0         | 46.4        | 35.8        | 27.3        | 52.1        | 25.4        |
| CorDA [13]           | DL-V2   | 94.7           | 87.6        | 87.6        | <b>90.2</b> | <b>63.1</b> | <b>89.7</b> | 40.2           | 66.7        | 47.0        | 40.6        | 30.7        | 51.6        | 56.0        | 48.9        | 57.5        | 0.0         | 47.8        | 35.9        | 39.8        | 56.6        | 24.8        |
| AdvEnt [11]          | DL-V2   | 89.9           | 81.6        | 83.9        | 83.7        | 36.5        | 77.1        | 28.5           | 57.4        | 34.0        | 25.2        | 29.2        | 22.4        | 23.3        | 29.4        | 39.1        | 1.5         | 32.3        | 27.9        | 28.4        | 43.8        | 26.4        |
| MaxSquare [3]        | DL-V2   | 89.4           | 82.1        | 85.3        | 84.6        | 43.0        | 78.2        | 30.3           | 63.0        | 39.4        | 21.3        | 30.5        | 24.0        | 33.5        | 36.4        | 43.0        | 5.5         | 34.7        | 22.9        | 34.7        | 46.4        | 25.7        |
| IntraDA [7]          | DL-V2   | 90.6           | 82.6        | 85.2        | 86.4        | 36.1        | 80.2        | 27.6           | 59.3        | 39.3        | 21.3        | 29.5        | 23.1        | 37.6        | 33.6        | 53.9        | 0.0         | 31.4        | 29.4        | 32.7        | 46.3        | 26.7        |
| BiMaL [10]           | DL-V2   | <b>91.2</b>    | 82.7        | 85.4        | 86.6        | 39.6        | 80.8        | 29.6           | 59.7        | 44.0        | 25.2        | 29.4        | 25.5        | 36.8        | 38.5        | 47.6        | 1.2         | 34.3        | 30.4        | 34.0        | 47.3        | 25.9        |
| SAC [1]              | DL-V2   | 90.3           | 86.6        | 87.5        | 88.5        | 53.9        | 86.0        | 45.1           | 67.6        | 40.2        | 27.4        | 42.5        | 42.9        | 45.1        | 49.0        | 54.6        | 9.8         | 48.6        | 29.7        | 26.6        | 53.8        | 24.2        |
| ProDA [14]           | DL-V2   | 87.8           | 79.7        | 88.6        | 88.8        | 56.0        | 82.1        | <b>45.6</b>    | <b>70.7</b> | <b>45.2</b> | <b>44.8</b> | <b>46.3</b> | <b>53.5</b> | 56.4        | 45.5        | 59.4        | 1.0         | 53.5        | 39.2        | 48.9        | 57.5        | 21.7        |
| <b>FREDOM</b>        | DL-V2   | 90.9           | <b>87.8</b> | <b>88.6</b> | 89.7        | 54.1        | 89.5        | 45.2           | 68.8        | 42.6        | 32.6        | 44.1        | <b>57.1</b> | <b>58.1</b> | <b>58.4</b> | <b>62.6</b> | <b>55.3</b> | 51.4        | <b>40.0</b> | <b>47.7</b> | <b>61.3</b> | <b>19.1</b> |
| TransDA-S [4]        | Trans.  | 92.9           | 88.2        | 89.6        | 91.4        | 59.1        | 94.1        | 47.6           | 74.3        | 42.0        | 32.0        | 42.5        | 39.2        | 51.4        | 54.0        | 58.0        | 44.4        | 57.6        | 45.3        | 48.3        | 60.6        | 20.8        |
| TransDA [4]          | Trans.  | 94.7           | 89.2        | 90.4        | 92.5        | 64.2        | 93.7        | 50.1           | 76.7        | 50.2        | 45.8        | 48.1        | 40.8        | 55.4        | 56.8        | 60.1        | 47.6        | 60.2        | 47.6        | 49.6        | 63.9        | 19.1        |
| ProCST [5]           | Trans.  | 95.8           | 89.8        | 90.2        | 92.3        | 69.6        | 93.0        | 49.8           | 72.2        | 50.3        | 45.0        | 55.8        | 63.3        | 63.1        | 72.2        | 78.8        | 65.1        | 56.8        | 44.9        | 56.4        | 68.7        | 17.1        |
| DAFormer [6]         | Trans.  | 95.7           | 89.4        | 89.9        | 92.3        | 70.2        | 92.5        | 49.6           | 72.2        | 47.9        | 48.1        | 53.5        | 59.4        | 61.8        | 74.5        | 78.2        | 65.1        | 55.8        | 44.7        | 55.9        | 68.3        | 17.3        |
| <b>FREDOM</b>        | Trans.  | <b>96.7</b>    | <b>90.9</b> | <b>91.6</b> | <b>94.1</b> | <b>74.8</b> | <b>94.4</b> | <b>57.5</b>    | <b>78.4</b> | <b>52.1</b> | <b>49.0</b> | <b>58.1</b> | <b>71.4</b> | <b>68.9</b> | <b>83.9</b> | <b>85.2</b> | <b>72.5</b> | <b>63.4</b> | <b>53.1</b> | <b>62.8</b> | <b>73.6</b> | <b>15.8</b> |

### 3.3. Qualitative Results

Figure 1 illustrates additional qualitative results of the SYNTHIA → Cityscapes experiments. In particular, we compare our results with AdvEnt [11], BiMaL [10], SAC [1], and DAFormer [6]. Overall, our approach produces better quality compared to prior methods. The predictions of segmentation maps of classes in minority groups have been improved and well-segmented compared to other methods.

### References

- [1] Nikita Araslanov, , and Stefan Roth. Self-supervised augmentation consistency for adapting semantic segmentation. In *Proceedings of the IEEE Conference on Computer Vision and Pattern Recognition (CVPR)*, 2021. 2, 3, 4
- [2] Mark Chen, Alec Radford, Rewon Child, Jeff Wu, Heewoo Jun, Prafulla Dhariwal, David Luan, and Ilya Sutskever. Generative pretraining from pixels. *ICML*, 2020. 2
- [3] Minghao Chen, Hongyang Xue, and Deng Cai. Domain adaptation for semantic segmentation with maximum squares loss. In *ICCV*, 2019. 3
- [4] Runfa Chen, Yu Rong, Shangmin Guo, Jiaqi Han, Fuchun Sun, Tingyang Xu, and Wenbing Huang. Smoothing matters: Momentum transformer for domain adaptive semantic segmentation. *CoRR*, 2022. 3
- [5] Shahaf Etedgui, Shady Abu-Hussein, and Raja Giryes. ProCST: Boosting semantic segmentation using progressive cyclic style-transfer, 2022. 3
- [6] Lukas Hoyer, Dengxin Dai, and Luc Van Gool. DAFormer: Improving network architectures and training strategies for domain-adaptive semantic segmentation. In *CVPR*, 2022. 2, 3, 4
- [7] Fei Pan, Inkyu Shin, Francois Rameau, Seokju Lee, and In So Kweon. Unsupervised intra-domain adaptation for semantic segmentation through self-supervision. In *CVPR*, 2020. 3
- [8] Alec Radford, Jeff Wu, Rewon Child, David Luan, Dario Amodei, and Ilya Sutskever. Language models are unsupervised multitask learners. 2019. 2

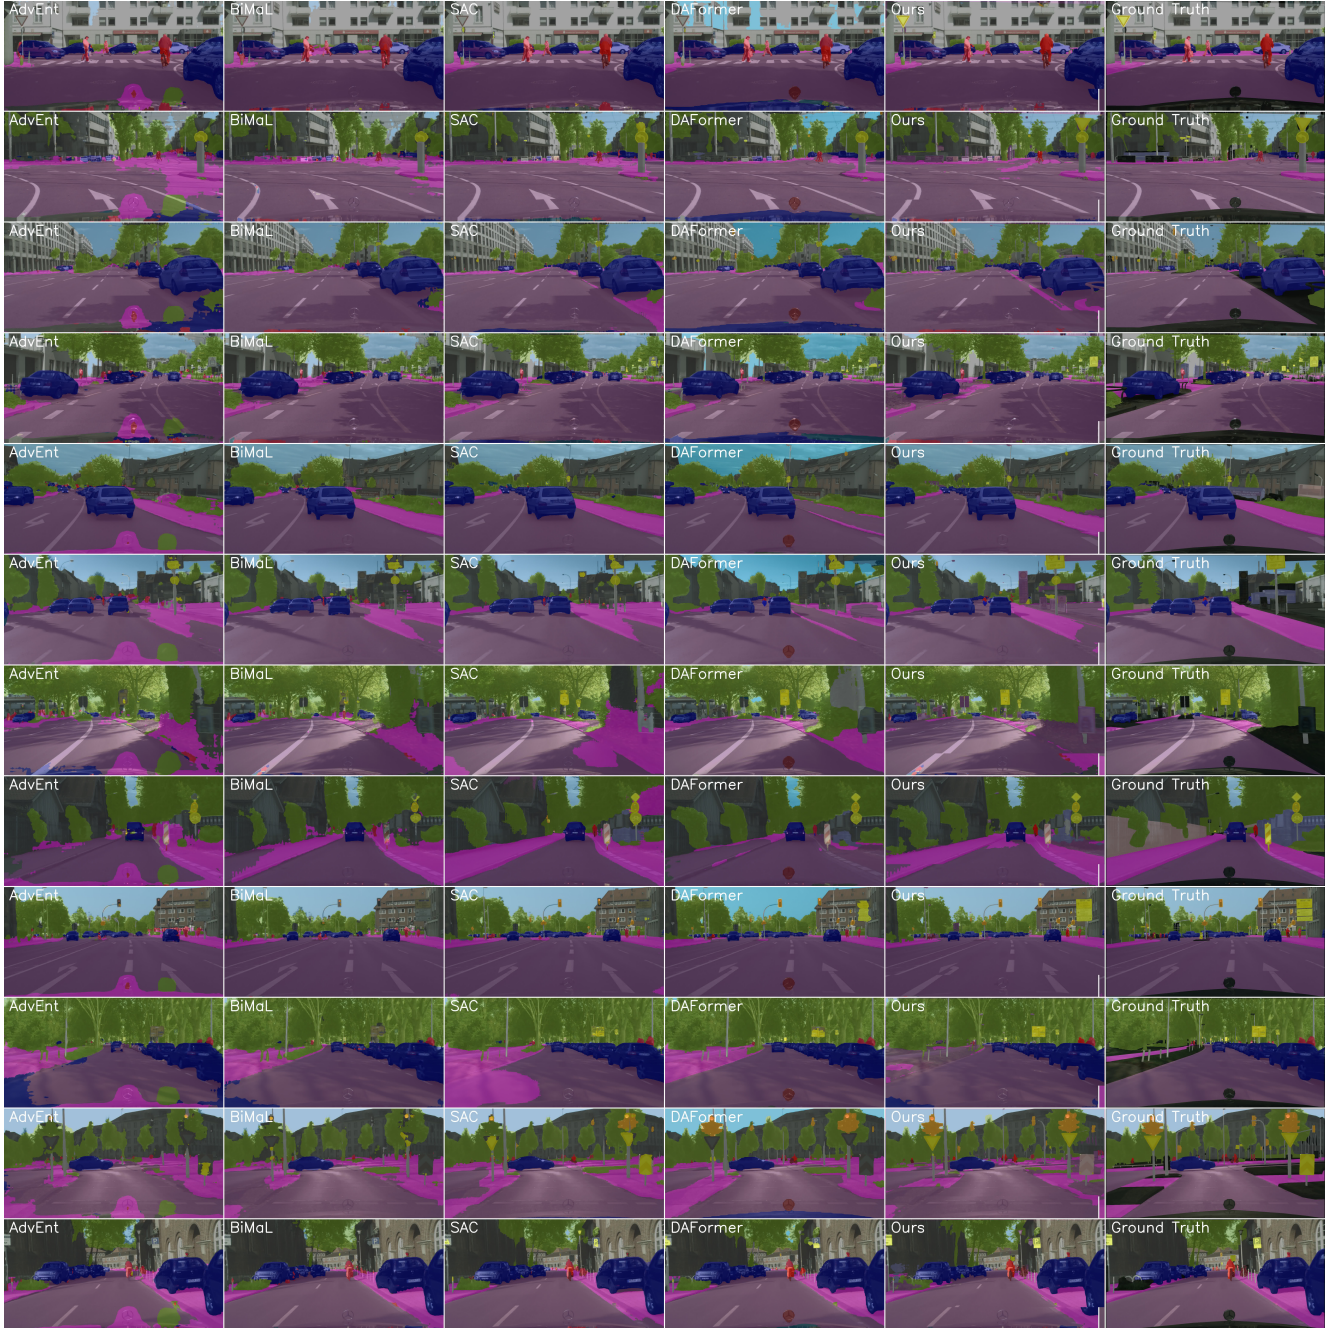

Figure 1. **SYNTHIA**  $\rightarrow$  **Cityscapes**. Qualitative Results of Our Proposed Approach. Columns 1-6 are the results of AdvEnt [11], BiMaL [10], SAC [1], DAFormer [6], our FREDOM approach, and Ground Truth (Best view in color and 2 $\times$  zoom).

- [9] Wilhelm Trasheden, Viktor Olsson, Juliano Pinto, and Lennart Svensson. Dacs: Domain adaptation via cross-domain mixed sampling. In *Proceedings of the IEEE/CVF Winter Conference on Applications of Computer Vision*, pages 1379–1389, 2021. 3
- [10] Thanh-Dat Truong, Chi Nhan Duong, Ngan Le, Son Lam Phung, Chase Rainwater, and Khoa Luu. Bimal: Bijective maximum likelihood approach to domain adaptation in semantic scene segmentation. In *ICCV*, 2021. 3, 4
- [11] Tuan-Hung Vu, Himalaya Jain, Maxime Bucher, Matthieu Cord, and Patrick Pérez. Advent: Adversarial entropy minimization for domain adaptation in semantic segmentation. In *CVPR*, 2019. 3, 4
- [12] Tuan-Hung Vu, Himalaya Jain, Maxime Bucher, Mathieu Cord, and Patrick Pérez. Dada: Depth-aware domain adaptation in semantic segmentation. In *ICCV*, 2019. 3

- [13] Qin Wang, Dengxin Dai, Lukas Hoyer, Luc Van Gool, and Olga Fink. Domain adaptive semantic segmentation with self-supervised depth estimation. In *Proceedings of the IEEE/CVF International Conference on Computer Vision*, 2021. 3
- [14] Pan Zhang, Bo Zhang, Ting Zhang, Dong Chen, Yong Wang, and Fang Wen. Prototypical pseudo label denoising and target structure learning for domain adaptive semantic segmentation. *arXiv preprint arXiv:2101.10979*, 2021. 3
- [15] Yang Zou, Zhiding Yu, BVK Vijaya Kumar, and Jinsong Wang. Unsupervised domain adaptation for semantic segmentation via class-balanced self-training. In *ECCV*, 2018. 3
